# Supplementary material for: Conserving Africa’s wildlife and wildlands through the COVID-19 crisis and beyond
Source: Springer Nature journal article supplement (doi:10.1038/s41559-020-1275-6), 2020-07-29
Supplement: 41559_2020_1275_MOESM1_ESM.pdf [file 41559_2020_1275_MOESM1_ESM.pdf]

In the format provided by the authors and unedited.

# Conserving Africa's wildlife and wildlands through the COVID-19 crisis and beyond

In the format provided by the authors and unedited

## SUPPLEMENTARY INFORMATION FOR

Conserving Africa's wildlife and wildlands through the COVID-19 crisis and beyond

**Table S1. Source of example information presented in Figure 2.**

| Example of COVID-19 impacts                      | Source                                                                                          |
|--------------------------------------------------|-------------------------------------------------------------------------------------------------|
| Arli National Park, Burkina Faso                 | WILD Foundation, pers. comm.                                                                    |
| Botswana                                         | DWNP, pers. comm.                                                                               |
| Chinko Reserve, CAR                              | African Parks, pers. comm.                                                                      |
| Communal Conservancies, Namibia                  | <sup>1</sup>                                                                                    |
| Gashaka Gumti National Park, Nigeria             | African Nature Investors, pers. comm.                                                           |
| Gonarezhou National Park, Zimbabwe               | Gonarezhou Conservation Trust, pers. comm.                                                      |
| Malawi                                           | Lilongwe Wildlife Trust, pers. comm.                                                            |
| Massai Mara Community Conservancies, Kenya       | MMWCA, pers. comm.                                                                              |
| Niassa National Reserve, Mozambique              | WCS, pers. comm.                                                                                |
| Oi Pejeta Conservancy, Kenya                     | <a href="https://www.instagram.com/p/B-PH8VknS9D/">https://www.instagram.com/p/B-PH8VknS9D/</a> |
| South African National Parks                     | <sup>2</sup>                                                                                    |
| Tacugama Chimpanzee Sanctuary, Sierra Leone      | Tacugama Chimpanzee Sanctuary, pers. comm.                                                      |
| Tanzania                                         | NA                                                                                              |
| Uganda Wildlife Authority                        | UWA, pers. comm. <sup>3</sup>                                                                   |
| Zimbabwe Parks and Wildlife Management Authority | ZimParks, pers. comm.                                                                           |

### References

1. NACSO. *The state of community conservation in Namibia*. [http://www.nacso.org.na/sites/default/files/2014-15\\_SoCC-Report.pdf](http://www.nacso.org.na/sites/default/files/2014-15_SoCC-Report.pdf) (2018).
2. South African National Parks. *Annual performance plan 2018/2019*. [https://www.sanparks.org/assets/docs/conservation/park\\_man/aenp-draft-mgmt-plan.pdf](https://www.sanparks.org/assets/docs/conservation/park_man/aenp-draft-mgmt-plan.pdf) (2018).
3. Uganda Wildlife Authority. *Corporate report 2018*. (2018).
